# Supplementary material for: Deep Eutectic Solvents as Phase Change Materials in Solar Thermal Power Plants: Energy and Exergy Analyses
Source: MDPI journal article supplement (doi:10.3390/molecules27041427), 2022-02-20
Supplement: s1 [file s1]

## Supplementary Information

# Deep eutectic solvents as phase change materials in solar thermal power plants: Energy and Exergy analyses

Hamed Peyrovedin<sup>1</sup>, Reza Haghbakhsh<sup>2,3</sup>, Ana Rita C. Duarte<sup>3</sup> and Alireza Shariati<sup>1,\*</sup>

<sup>1</sup> School of Chemical and Petroleum Engineering, Shiraz University, Shiraz 71345-51154, Iran

<sup>2</sup> Department of Chemical Engineering, Faculty of Engineering, University of Isfahan, 81746-73441, Isfahan, Iran

<sup>3</sup> LAQV, REQUIMTE, Departamento de Química da Faculdade de Ciências e Tecnologia, Universidade Nova de Lisboa, 2829-516 Caparica, Portugal

\* Correspondence: [shariati@shirazu.ac.ir](mailto:shariati@shirazu.ac.ir); Tel.: +98 71 36133704

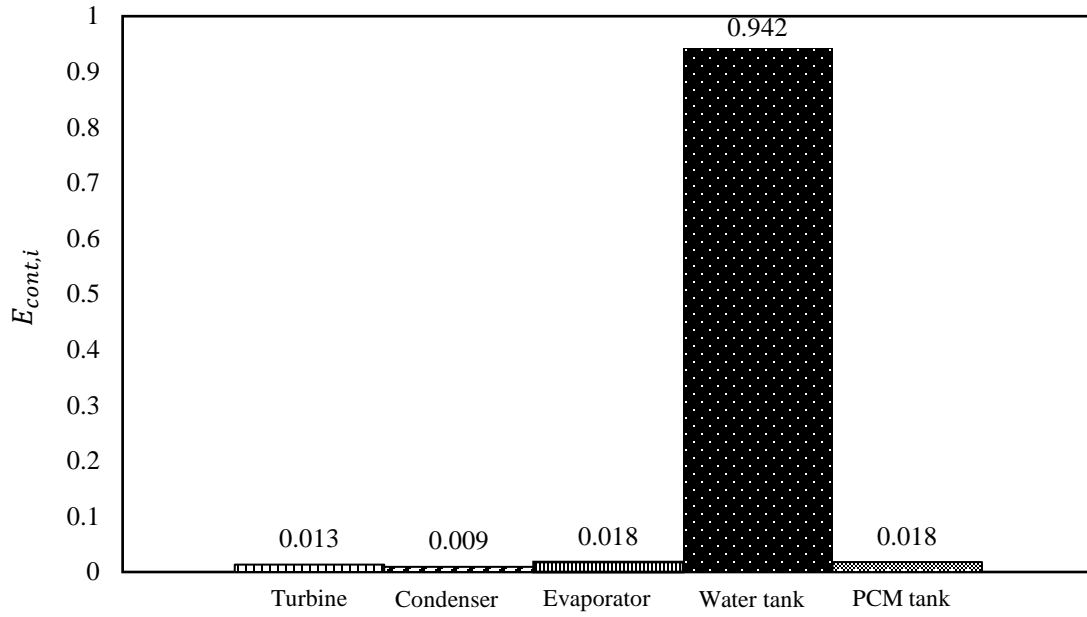

**Figure S1.** The contribution of each part of the cycle in the exergy destruction of the system which uses paraffin as the PCM, at a condenser pressure of 1800 kPa and condenser temperature of 30 °C .

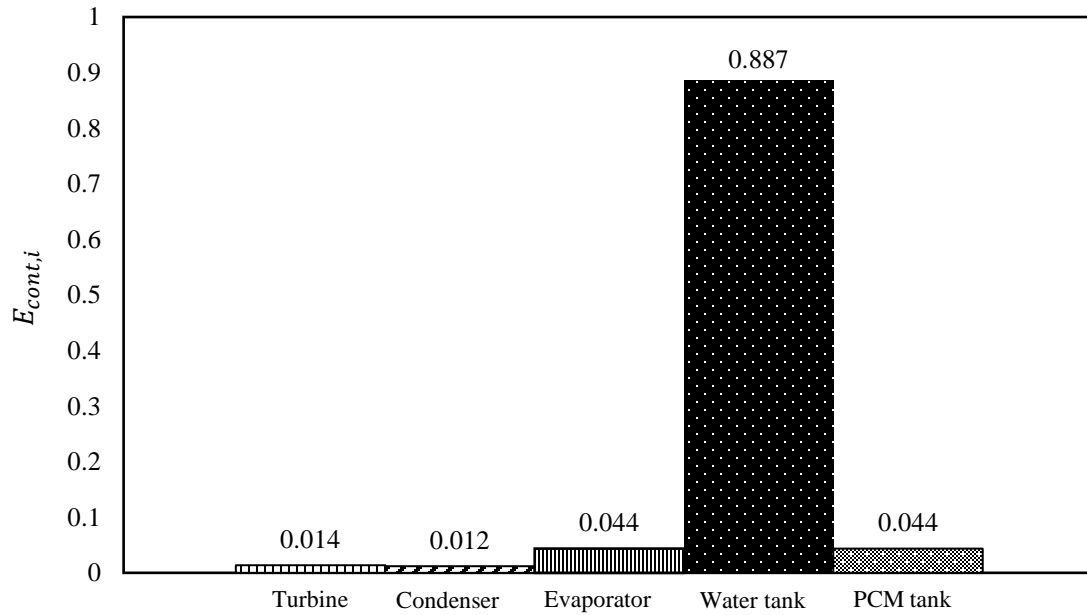

**Figure S2.** The contribution of each part of the cycle in the exergy destruction of the system which uses DES1 as the PCM at a condenser pressure of 2000 kPa and condenser temperature of 30 °C .

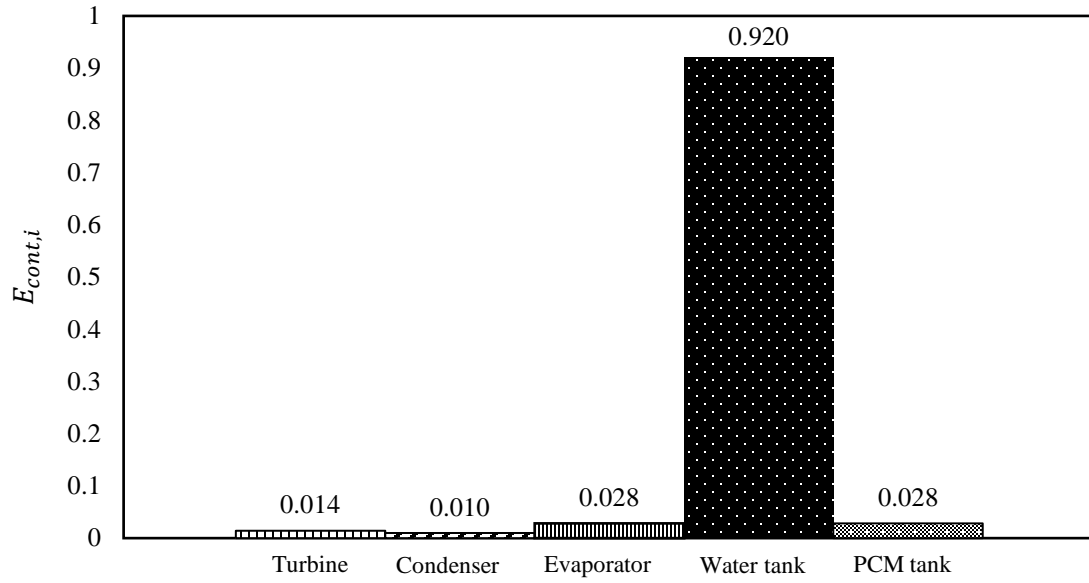

**Figure S3.** The contribution of each part of the cycle in the exergy destruction of the system which uses DES2 as the PCM at a condenser pressure of 2000 kPa and condenser temperature of 30 °C .

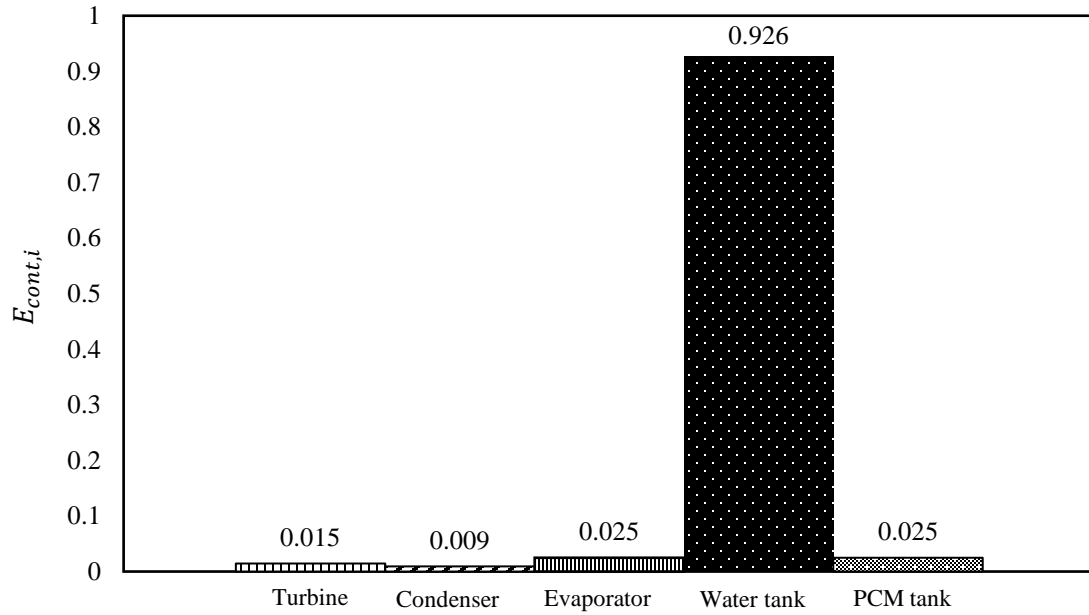

**Figure S4.** The contribution of each part of the cycle in the exergy destruction of the system which uses DES3 as the PCM at a condenser pressure of 2000 kPa and condenser temperature of 30 °C .

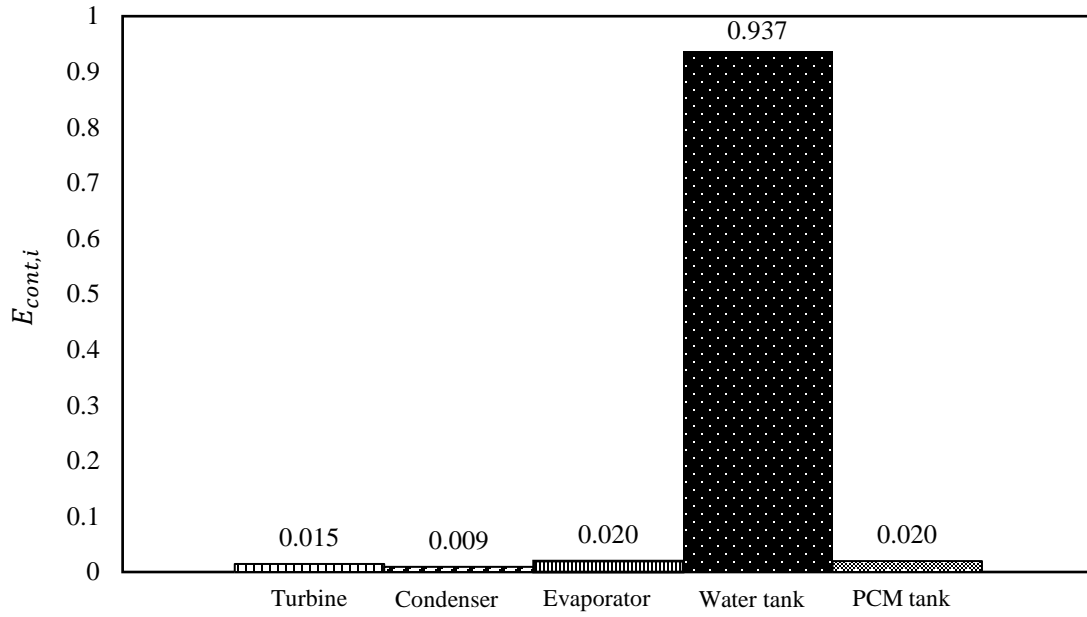

**Figure S5.** The contribution of each part of the cycle in the exergy destruction of the system which uses DES5 as the PCM at a condenser pressure of 2000 kPa and condenser temperature of 30 °C .

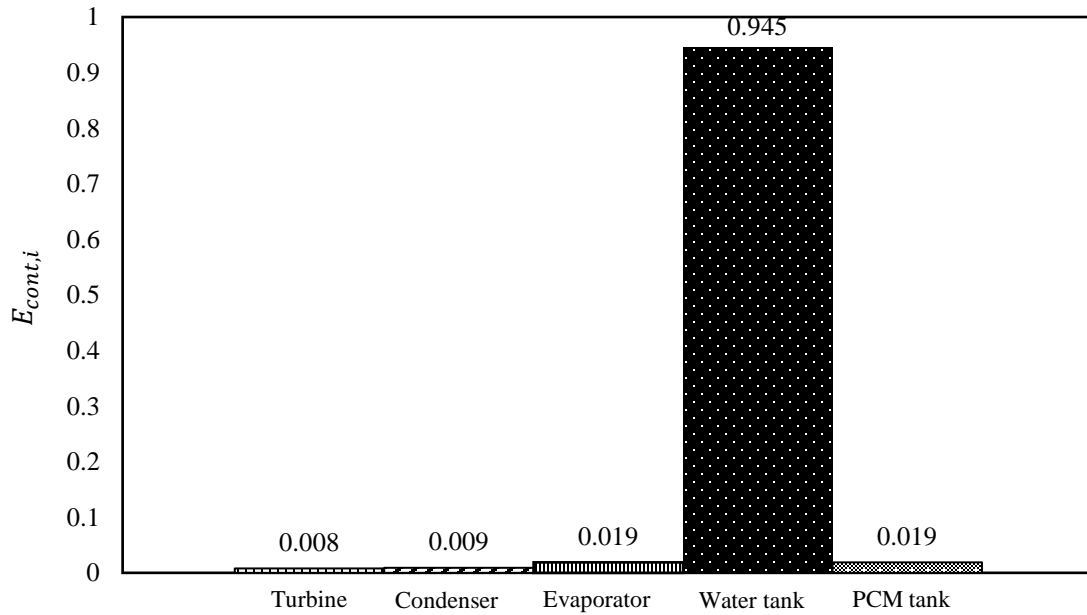

**Figure S6.** The contribution of each part of the cycle in the exergy destruction of the system which uses DES6 as the PCM at a condenser pressure of 1300 kPa and condenser temperature of 30 °C .

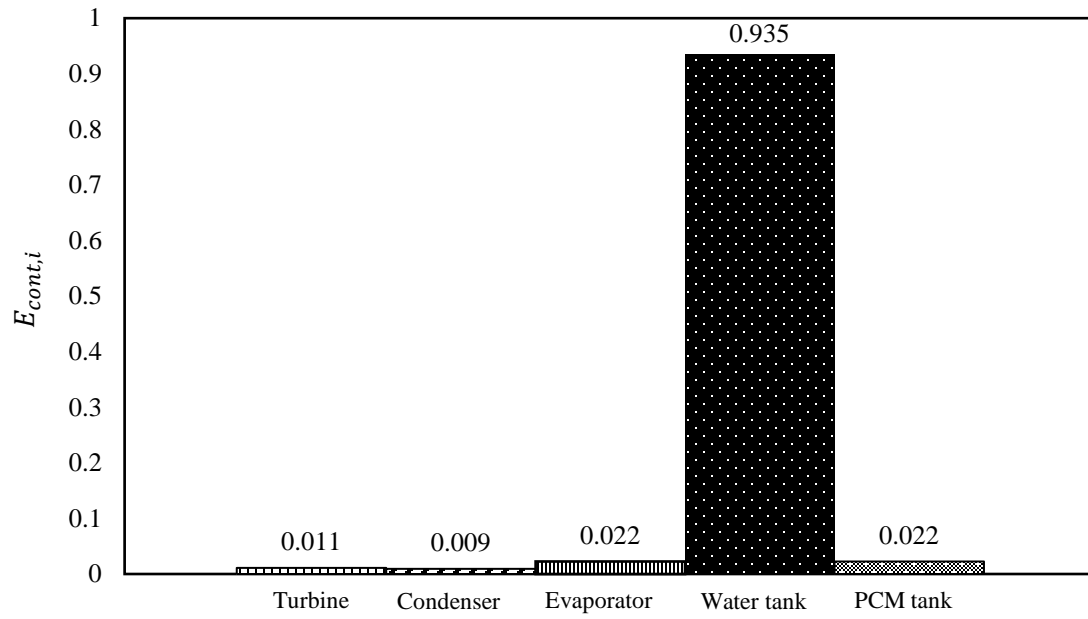

**Figure S7.** The contribution of each part of the cycle in the exergy destruction of the system which uses DES7 as the PCM at a condenser pressure of 1600 kPa and condenser temperature of 30 °C .
